# Supplementary material
Source: PubMed Central journal article supplement (PMC7442705)
Supplement: NIHMS1582957-supplement-2.pdf [file NIHMS1582957-supplement-2.pdf]

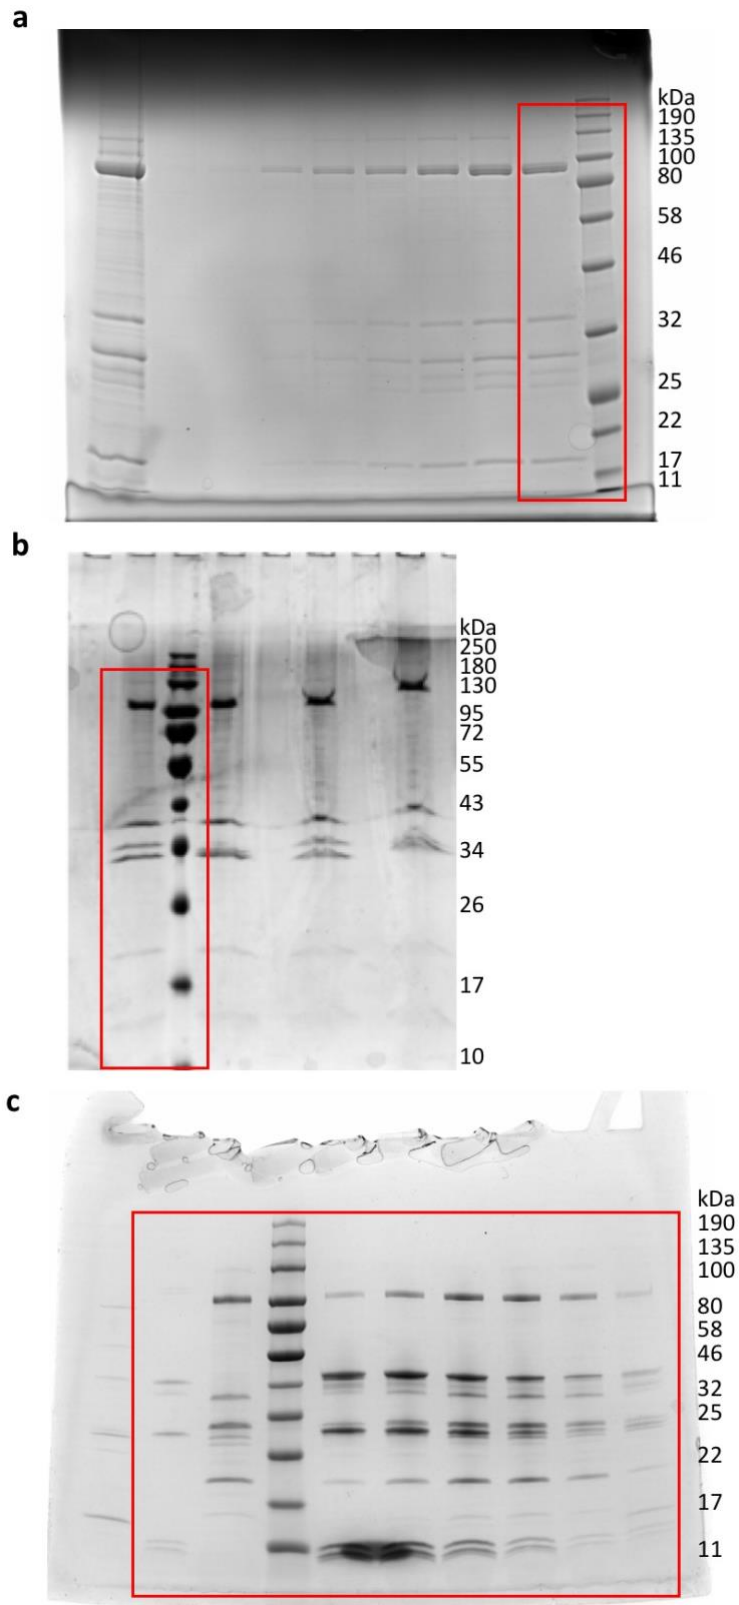

**Supplementary Figure 1.** Uncropped SDS-PAGE gels used for preparing Fig. 1a, Fig. 3g, and Extended Data Fig. 6b.
